# Supplementary material
Source: Elsevier journal article supplement (https://authors.library.caltech.edu/53046/7/mmc1.pdf)
Supplement: mmc1 [file mmc1.pdf]

**Supplementary Table 1.** Analytical data for Cariaco Basin sediments. Core depths are reported as centimeters below the seafloor (cmbsf). Average calculated values for the authigenic Cr isotope composition ( $\delta^{53}\text{Cr}_{\text{auth}}^{\text{avg}}$ ) use the mean Cr/Ti value from lower oxic sediments as a detrital background. Isotope values for acid leach experiments are reported as  $\delta^{53}\text{Cr}_{\text{leach}}$ , along with the acid strength employed during each leaching experiment ( $[\text{HNO}_3]$ ). External reproducibility (uniform  $2\sigma$ ) is 0.09‰.

| <b>Depth</b><br><b>cmbsf</b> | <b>Cr</b><br>$\mu\text{g g}^{-1}$ | <b>Ti</b><br>$\mu\text{g g}^{-1}$ | $f_{\text{auth}}^{\text{avg}}$<br>- | $\delta^{53}\text{Cr}_{\text{bulk}}$<br>‰ | $\delta^{53}\text{Cr}_{\text{auth}}^{\text{avg}}$<br>‰ | $\delta^{53}\text{Cr}_{\text{leach}}$<br>‰ | $[\text{Cr}]_{\text{leach}}$<br>$\mu\text{g g}^{-1}$ | $[\text{HNO}_3]$<br>N | $[\text{Ti}]_{\text{leach}}$<br>$\mu\text{g g}^{-1}$ | $[\text{Al}]_{\text{leach}}$<br>wt% |
|------------------------------|-----------------------------------|-----------------------------------|-------------------------------------|-------------------------------------------|--------------------------------------------------------|--------------------------------------------|------------------------------------------------------|-----------------------|------------------------------------------------------|-------------------------------------|
| 10                           | 94                                | 2700                              | 0.41                                |                                           |                                                        |                                            |                                                      |                       |                                                      |                                     |
| 15                           | 91                                | 2700                              | 0.39                                |                                           |                                                        |                                            |                                                      |                       |                                                      |                                     |
| 20                           | 96                                | 2200                              | 0.53                                | 0.33                                      | 0.51                                                   | 0.57                                       | 35.67                                                | 1.20                  | 0.009                                                | 0.45                                |
| 25                           | 95                                | 2600                              | 0.44                                |                                           |                                                        |                                            |                                                      |                       |                                                      |                                     |
| 30                           | 98                                | 2600                              | 0.46                                |                                           |                                                        |                                            |                                                      |                       |                                                      |                                     |
| 35                           | 98                                | 2360                              | 0.51                                | 0.35                                      | 0.57                                                   | 0.56                                       | 37.21                                                | 1.20                  | 0.009                                                | 0.46                                |
| 45                           | 100                               | 2800                              | 0.43                                |                                           |                                                        |                                            |                                                      |                       |                                                      |                                     |
| 55                           | 97                                | 2600                              | 0.45                                |                                           |                                                        |                                            |                                                      |                       |                                                      |                                     |
| 85                           | 106                               | 2700                              | 0.48                                |                                           |                                                        |                                            |                                                      |                       |                                                      |                                     |
| 115                          | 104                               | 2470                              | 0.51                                | 0.32                                      | 0.50                                                   | 0.53                                       | 37.06                                                | 1.20                  | 0.009                                                | 0.43                                |
| 125                          | 101                               | 2600                              | 0.47                                |                                           |                                                        |                                            |                                                      |                       |                                                      |                                     |
| 155                          | 113                               | 2900                              | 0.47                                |                                           |                                                        |                                            |                                                      |                       |                                                      |                                     |
| 200                          | 113                               | 2830                              | 0.49                                | 0.34                                      | 0.56                                                   | 0.56                                       | 37.41                                                | 1.20                  | 0.009                                                | 0.43                                |
| 215                          | 120                               | 3000                              | 0.49                                |                                           |                                                        |                                            |                                                      |                       |                                                      |                                     |
| 245                          | 108                               | 2470                              | 0.53                                | 0.38                                      | 0.60                                                   |                                            |                                                      |                       |                                                      |                                     |
| 260                          | 132                               | 2880                              | 0.55                                | 0.27                                      | 0.38                                                   | 0.57                                       | 37.11                                                | 1.20                  | 0.007                                                | 0.40                                |
| 275                          | 121                               | 2750                              | 0.53                                | 0.24                                      | 0.33                                                   | 0.48                                       | 39.53                                                | 0.60                  | 0.008                                                | 0.42                                |
| 275                          | 121                               | 2750                              | 0.53                                | 0.24                                      | 0.33                                                   | 0.54                                       | 51.08                                                | 3.00                  | 0.012                                                | 0.57                                |
| 290                          | 135                               | 3100                              | 0.53                                |                                           |                                                        |                                            |                                                      |                       |                                                      |                                     |
| 340                          | 114                               | 3200                              | 0.43                                |                                           |                                                        |                                            |                                                      |                       |                                                      |                                     |
| 380                          | 107                               | 3000                              | 0.43                                |                                           |                                                        |                                            |                                                      |                       |                                                      |                                     |
| 420                          | 76                                | 2160                              | 0.42                                | 0.38                                      | 0.74                                                   | 0.54                                       | 26.05                                                | 1.20                  | 0.007                                                | 0.28                                |
| 440                          | 71                                | 2000                              | 0.42                                |                                           |                                                        |                                            |                                                      |                       |                                                      |                                     |
| 450                          | 73                                | 1930                              | 0.46                                | 0.32                                      | 0.55                                                   | 0.66                                       | 26.73                                                | 0.60                  | 0.006                                                | 0.30                                |
| 450                          | 73                                | 1930                              | 0.46                                | 0.32                                      | 0.55                                                   | 0.66                                       | 35.59                                                | 3.00                  | 0.010                                                | 0.43                                |
| 450                          | 73                                | 1930                              | 0.46                                | 0.32                                      | 0.55                                                   | 0.66                                       | 36.77                                                | 6.00                  | 0.008                                                | 0.45                                |
| 470                          | 62                                | 1620                              | 0.47                                | 0.37                                      | 0.65                                                   | 0.65                                       | 25.73                                                | 0.60                  | 0.007                                                | 0.31                                |
| 470                          | 62                                | 1620                              | 0.47                                | 0.37                                      | 0.65                                                   | 0.62                                       | 32.96                                                | 3.00                  | 0.009                                                | 0.43                                |
| 490                          | 77                                | 2300                              | 0.39                                |                                           |                                                        |                                            |                                                      |                       |                                                      |                                     |

|        |     |      |      |      |      |       |       |      |       |      |
|--------|-----|------|------|------|------|-------|-------|------|-------|------|
| 510    | 89  | 2410 | 0.45 | 0.28 | 0.47 | 0.55  | 36.31 | 1.20 | 0.009 | 0.40 |
| 530    | 96  | 2700 | 0.42 |      |      |       |       |      |       |      |
| 550    | 83  | 2200 | 0.46 |      |      |       |       |      |       |      |
| 570    | 93  | 2800 | 0.38 |      |      |       |       |      |       |      |
| 590    | 104 | 2600 | 0.49 |      |      |       |       |      |       |      |
| 600    | 107 | 3100 | 0.41 |      |      |       |       |      |       |      |
| 610    | 111 | 3900 | 0.28 |      |      |       |       |      |       |      |
| 615    | 106 | 2840 | 0.45 | 0.34 | 0.60 | 0.59  | 33.56 | 0.60 | 0.010 | 0.44 |
| 615    | 106 | 2840 | 0.45 | 0.34 | 0.60 | 0.56  | 42.16 | 3.00 | 0.012 | 0.57 |
| 615    | 106 | 2840 | 0.45 | 0.34 | 0.60 | 0.60  | 45.08 | 6.00 | 0.010 | 0.57 |
| 620    | 101 | 3200 | 0.35 |      |      |       |       |      |       |      |
| 625    | 99  | 2970 | 0.39 | 0.26 | 0.47 | 0.54  | 27.34 | 0.60 | 0.008 | 0.33 |
| 625    | 99  | 2970 | 0.39 | 0.26 | 0.47 | 0.55  | 39.94 | 3.00 | 0.012 | 0.56 |
| 625    | 99  | 2970 | 0.39 | 0.26 | 0.47 | 0.52  | 39.31 | 6.00 | 0.009 | 0.55 |
| 635    | 94  | 3400 | 0.26 |      |      |       |       |      |       |      |
| 648.75 | 110 | 3200 | 0.40 |      |      |       |       |      |       |      |
| 651.25 | 117 | 4500 | 0.21 |      |      |       |       |      |       |      |
| 660    | 93  | 3400 | 0.25 |      |      |       |       |      |       |      |
| 665    | 77  | 3250 | 0.14 |      |      | 0.27  | 27.00 | 0.60 | 0.006 | 0.60 |
| 665    | 77  | 3250 | 0.14 |      |      | 0.25  | 26.51 | 3.00 | 0.010 | 0.57 |
| 665    | 77  | 3250 | 0.14 |      |      | 0.24  | 27.15 | 6.00 | 0.008 | 0.62 |
| 670    | 72  | 3700 | 0.00 |      |      |       |       |      |       |      |
| 675    | 81  | 3590 | 0.09 |      |      | 0.24  | 21.47 | 3.00 | 0.005 | 0.30 |
| 675    | 81  | 3590 | 0.09 |      |      | 0.20  | 13.94 | 6.00 | 0.008 | 0.58 |
| 680    | 91  | 3320 | 0.25 | 0.17 | 0.27 |       |       |      |       |      |
| 685    | 81  | 3900 | 0.01 |      |      |       |       |      |       |      |
| 710    | 100 | 4900 | 0.00 |      |      | -0.04 | 16.96 | 1.20 | 0.009 | 0.34 |
| 725    | 82  | 5000 | 0.00 |      |      |       |       |      |       |      |
| 730    | 59  | 5600 | 0.00 |      |      |       |       |      |       |      |
| 740    | 83  | 5400 | 0.00 |      |      |       |       |      |       |      |
| 755    | 123 | 4900 | 0.18 | 0.12 | 0.02 |       |       |      |       |      |
| 760    | 105 | 5500 | 0.00 |      |      |       |       |      |       |      |
| 770    | 100 | 4970 | 0.00 | 0.09 | 0.09 |       |       |      |       |      |
| 785    | 79  | 4300 | 0.00 |      |      |       |       |      |       |      |
